# Supplementary material
Source: publisher figshare collection journal article supplement (https://aacr.figshare.com/ndownloader/files/39887499)
Supplement: Supplementary file 1 [file 39887499]

**Table S4:** CTC biomarker group incidence by PSMA optimal cutoff (AR-v7, chromosomal instability (CIN), and neuroendocrine (NE) at baseline (N=97) and progression (N=57).


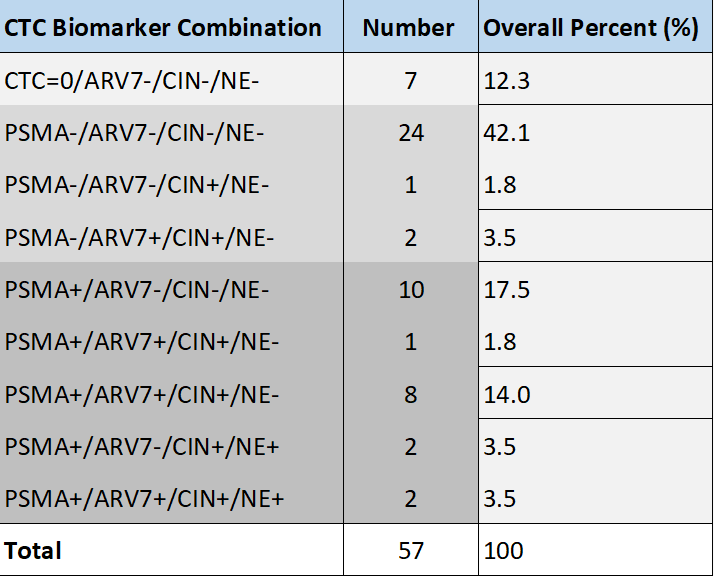

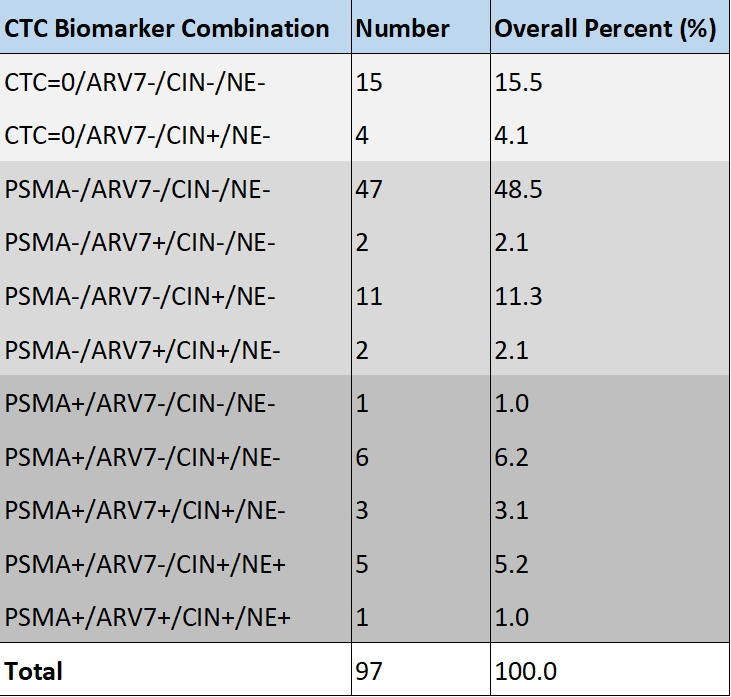


**Progression**

**Baseline**
